# Supplementary material for: Real-World Therapy with Pembrolizumab: Outcomes and Surrogate Endpoints for Predicting Survival in Advanced Melanoma Patients in Germany
Source: MDPI journal article supplement (doi:10.3390/cancers14071804), 2022-04-01
Supplement: s1 [file s1]

Supplementary Material

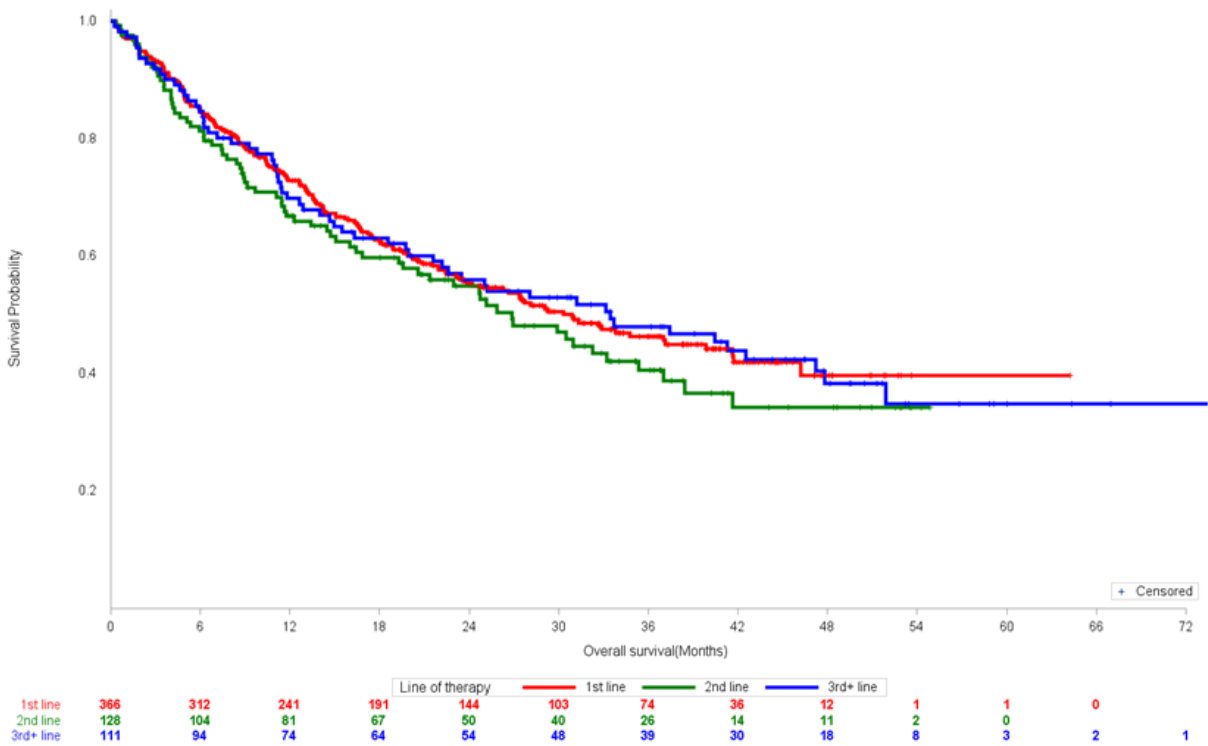

(a)

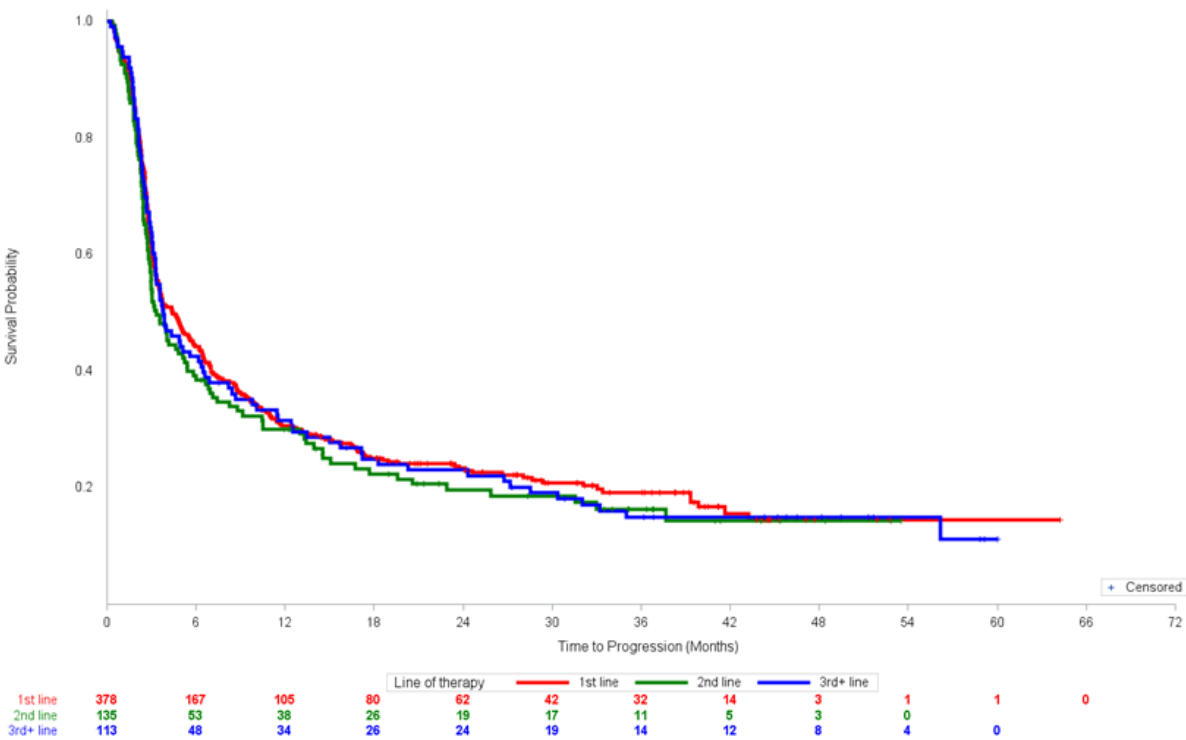

(b)

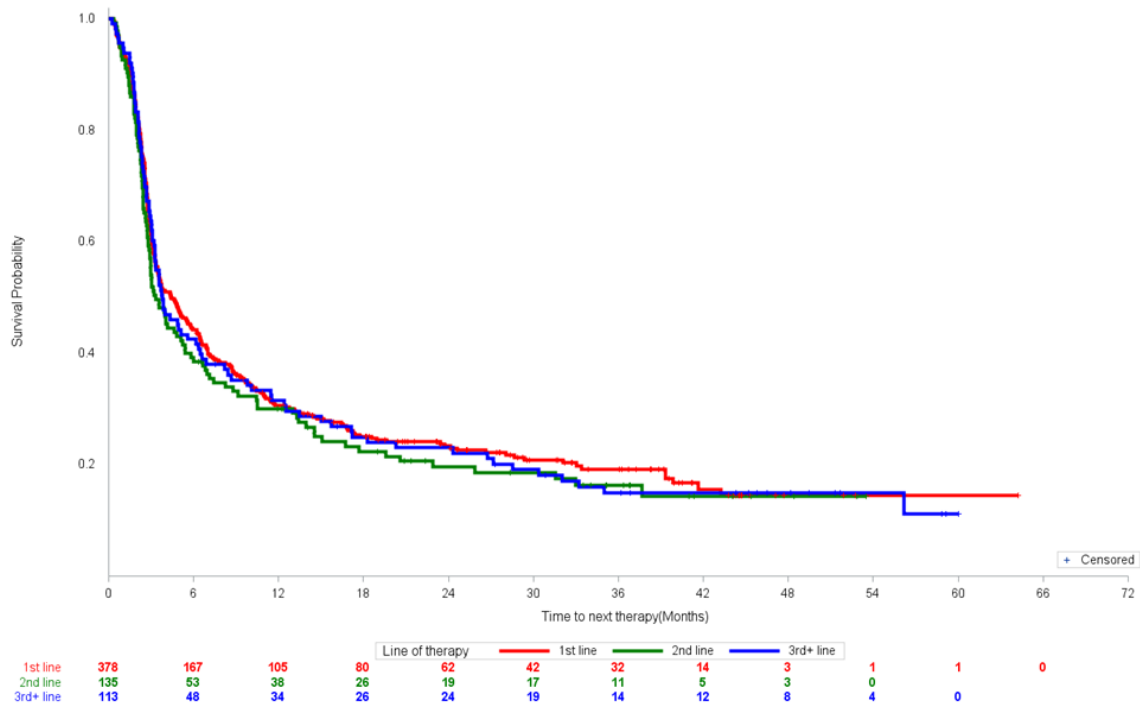

(c)

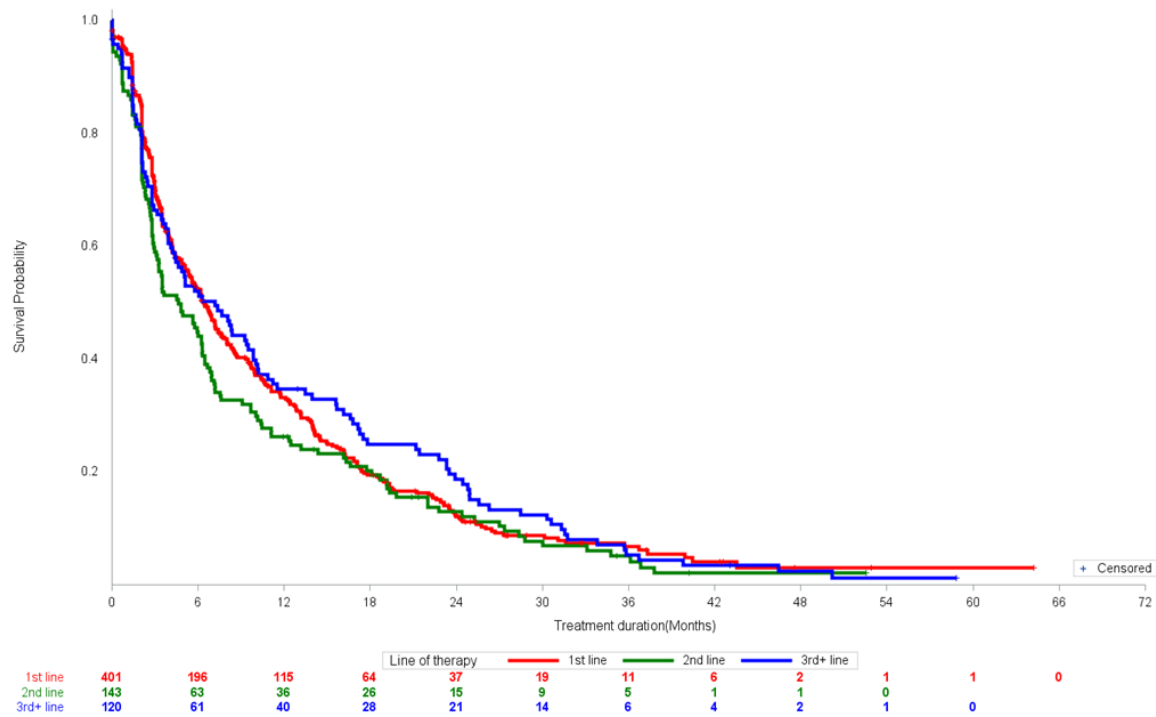

(d)

**Figure S1.** a-d Kaplan Meier curves showing probability estimates for rwOS (A) rwPFS (B), rwTtNT (C), and rwToT (D) of patients with advanced melanoma treated with pembrolizumab by line of therapy.

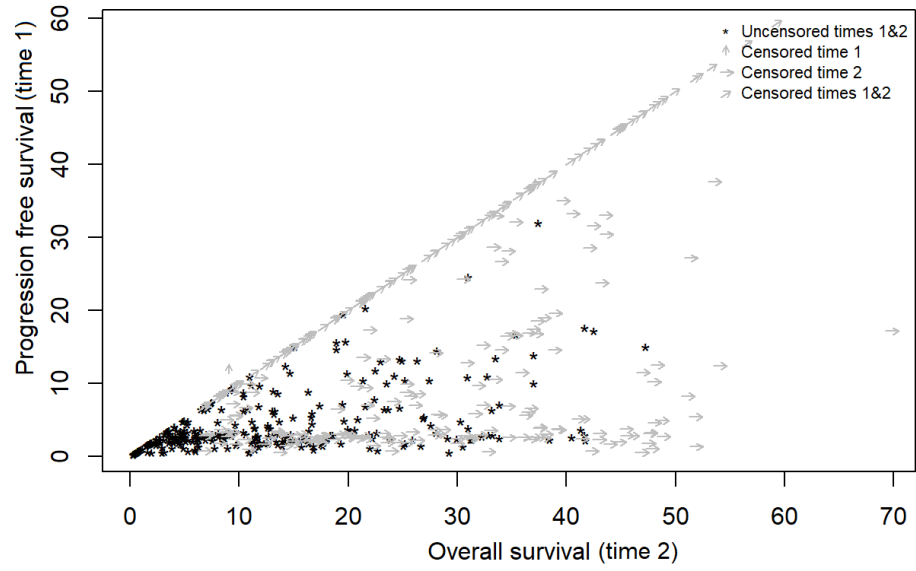

(a)

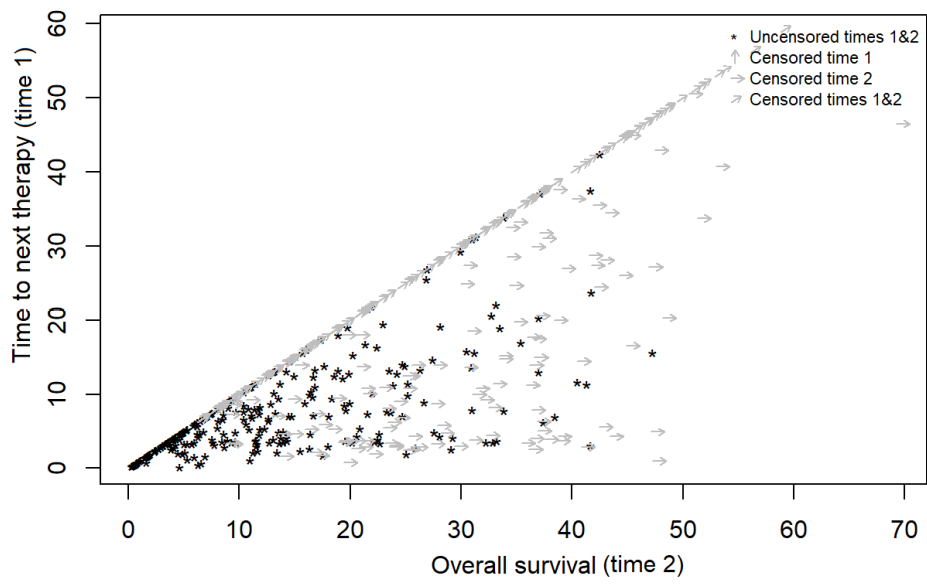

(b)

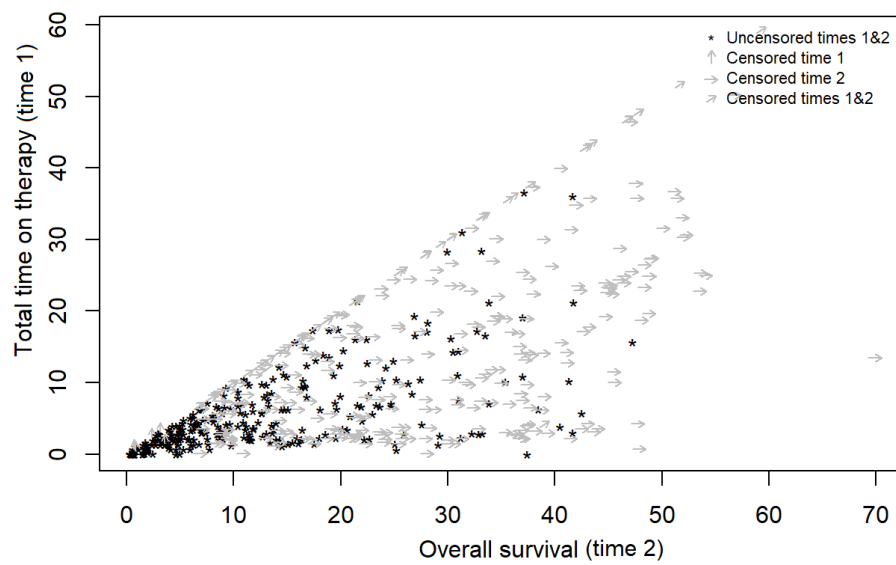

(c)

**Figure S2.** a-c Scatter plots depicting correlations between rwOS and rwPFS (A), rwOS and rwTtNT (B), and rwOS and rwToT (C) of patients with advanced melanoma treated with pembrolizumab, irrespective of therapy line.

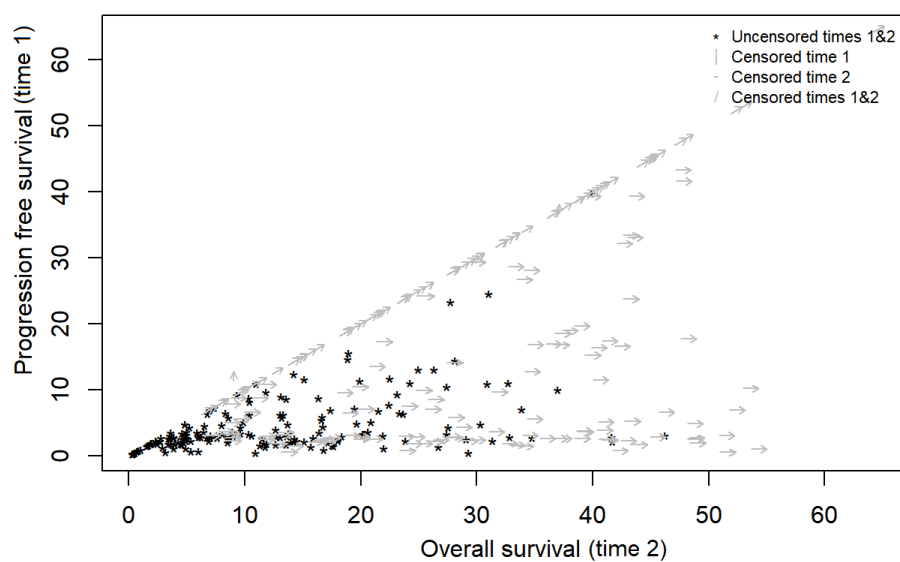

(a)

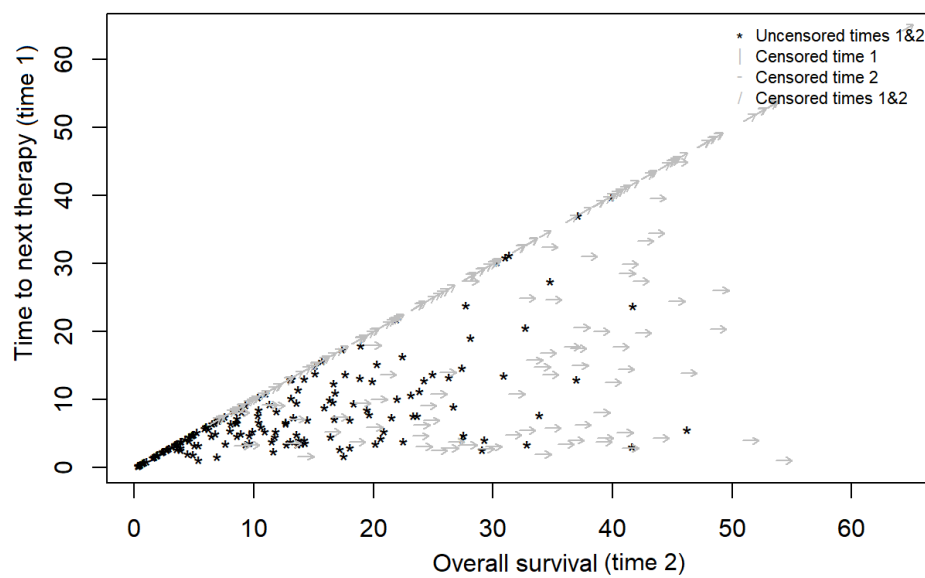

(b)

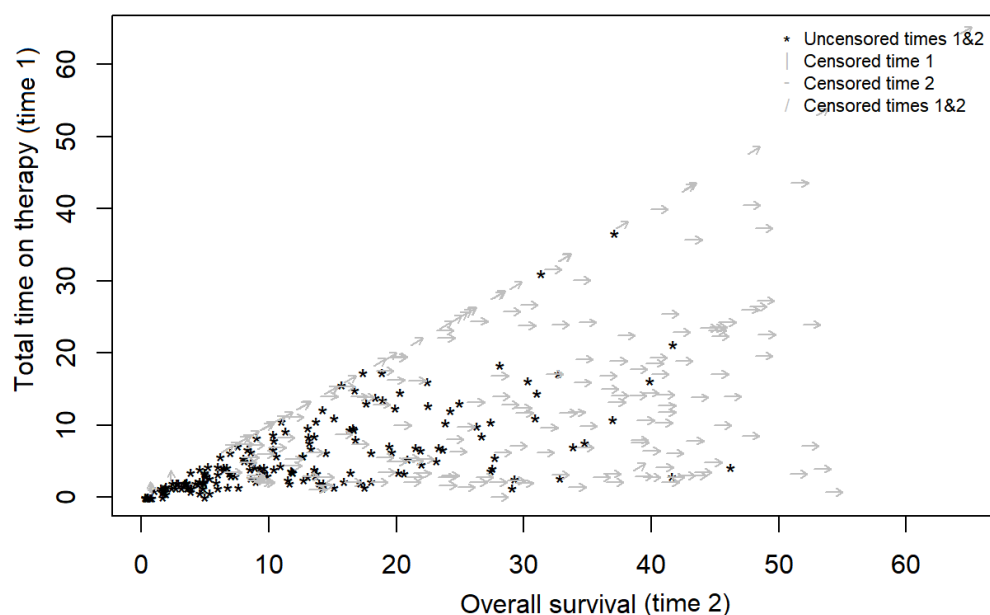

(c)

**Figure S3.** c Scatter plots depicting correlations between rwOS and rwPFS (A), rwOS and rwTtNT (B), and rwOS and rwToT (C) of patients with advanced melanoma treated with 1<sup>st</sup> line pembrolizumab.

**Table S1.** Treatment history by pembrolizumab line of therapy.

| Type of anti-cancer treatment | 1st line  | 2nd line  | 3+ line   |
|-------------------------------|-----------|-----------|-----------|
| <b>Patient count</b>          | N=401     | N=143     | N=120     |
| BRAF/MEK inhibitor n (%)      | 37 (9.2)  | 51 (35.7) | 57 (47.5) |
| Anti-CTLA4 n (%)              | 31 (7.7)  | 63 (44.1) | 73 (60.8) |
| Anti-CTLA4+PD-1 n (%)         | 72 (18.0) | 15 (10.5) | 5 (4.2)   |
| Anti-PD-1 monotherapy n (%)   | 35 (8.7)  | 10 (7.0)  | 7 (5.8)   |
| Other* n(%)                   | 59 (14.7) | 52 (36.4) | 81 (6.8)  |

\* includes interferons, chemotherapies and combinations of therapies not specifically included in above categories.

**Table S2.** Kaplan-Meier estimate for median rwOS and rwPFS (from index date), overall and by line of therapy.

| <b>Estimate</b>                                 | <b>Overall</b>    | <b>1st line</b>   | <b>2nd line</b>   | <b>3+ line</b>    |
|-------------------------------------------------|-------------------|-------------------|-------------------|-------------------|
| <b>Survival time rwOS</b>                       | N=605             | N=366             | N=128             | N=111             |
| Censored observations n (%)                     | 299 (49.4)        | 191 (52.2)        | 58 (45.3)         | 50 (45.1)         |
| Events n (%)                                    | 306 (50.6)        | 175 (47.8)        | 70 (54.7)         | 61 (55.0)         |
| Median survival time (95% CI), months           | 30.5 (25.0, 35.4) | 30.9 (23.8, 41.6) | 26.9 (19.3, 37.0) | 33.5 (21.6, 47.8) |
| <b>Survival rate rwOS, % (SE)</b>               |                   |                   |                   |                   |
| 6 months                                        | 84.3 (1.5)        | 85.2 (1.9)        | 81.3 (3.4)        | 84.7 (3.4)        |
| 12 months                                       | 71.0 (1.9)        | 72.9 (2.4)        | 66.8 (4.2)        | 69.8 (4.4)        |
| 18 months                                       | 62.2 (2.0)        | 62.8 (2.6)        | 59.8 (4.4)        | 63.1 (4.7)        |
| 24 months                                       | 55.4 (2.1)        | 55.3 (2.8)        | 54.9 (4.6)        | 56.0 (4.8)        |
| <b>Real-world progression free time</b>         |                   |                   |                   |                   |
|                                                 | N=626             | N=378             | N=135             | N=113             |
| Censored observations n (%)                     | 124 (19.8)        | 81 (21.4)         | 25 (18.5)         | 18 (15.9)         |
| Events n (%)                                    | 502 (80.2)        | 297 (78.6)        | 110 (81.5)        | 95 (84.1)         |
| Median survival time (95% CI), months           | 3.9 (3.5, 4.9)    | 4.4 (3.5, 5.8)    | 3.35 (2.9, 5.2)   | 3.81 (3.22, 6.3)  |
| <b>Real-world progression free rate, % (SE)</b> |                   |                   |                   |                   |
| 6 months                                        | 42.8 (2.0)        | 44.2 (2.6)        | 39.3 (4.2)        | 42.5 (4.7)        |
| 12 months                                       | 30.7 (1.9)        | 30.6 (2.4)        | 30.0 (4.0)        | 31.5 (4.4)        |
| 18 months                                       | 24.5 (1.8)        | 25.1 (2.3)        | 22.4 (3.7)        | 24.9 (4.1)        |
| 24 months                                       | 22.5 (1.7)        | 23.4 (2.3)        | 19.6 (3.6)        | 23.0 (4.0)        |

Note. NR: not reached; rwOS: real-world overall survival; rwPFS: real-world progression free survival.

**Table S3.** Kaplan-Meier estimate for median rwTtNT (from index date) and on treatment rates, overall and by line of therapy.

| Estimate                                                          | Overall          | 1st line         | 2nd line        | 3+ line          |
|-------------------------------------------------------------------|------------------|------------------|-----------------|------------------|
| <b>Median rwTtNT</b>                                              | N=664            | N=378            | N=135           | N=113            |
| Censored observations, n (%)                                      | 230 (34.6)       | 148 (36.9)       | 43 (30.1)       | 39 (32.5)        |
| Events, n (%)                                                     | 434 (65.4)       | 253 (63.1)       | 100 (69.9)      | 81 (67.5)        |
| Median rwTtNT (95% CI), months                                    | 10.7 (9.0, 12.9) | 10.8 (9.0, 13.6) | 8.9 (7.0, 13.4) | 12.5 (8.2, 18.5) |
| <b>Estimates for rates of not on subsequent treatment, % (SE)</b> |                  |                  |                 |                  |
| 6 months                                                          | 65.5 (1.9)       | 66.8 (2.4)       | 59.8 (4.2)      | 67.8 (4.4)       |
| 12 months                                                         | 47.6 (2.0)       | 48.4 (2.6)       | 42.9 (4.3)      | 50.9 (4.8)       |
| 18 months                                                         | 37.5 (2.0)       | 37.8 (2.6)       | 33.8 (4.3)      | 41.1 (4.7)       |
| 24 months                                                         | 33.8 (2.0)       | 34.1 (2.6)       | 32.0 (4.2)      | 35.1 (4.6)       |

Note. CI: confidence interval; rwTtNT: real-world time to next treatment; SE: standard error.

**Table S4.** Kaplan-Meier estimate for median rwToT (from index date), overall and by line of therapy.

| Estimate                                                | Overall        | 1st line       | 2nd line       | 3+ line        |
|---------------------------------------------------------|----------------|----------------|----------------|----------------|
| <b>Median rwToT</b>                                     | N=664          | N=401          | N=143          | N=120          |
| Censored observations, n (%)                            | 78 (11.7)      | 62 (15.5)      | 10 (7.0)       | 6 (5.0)        |
| Events, n (%)                                           | 586 (88.3)     | 339 (84.5)     | 133 (93.0)     | 114 (95.0)     |
| Median rwToT (95% CI), months                           | 6.2 (5.1, 6.8) | 6.4 (5.3, 7.4) | 4.6 (3.1, 6.3) | 7.1 (4.2, 9.9) |
| <b>Estimates for restricted mean rwToT (SE), months</b> |                |                |                |                |
| At 24 months                                            | 9.3 (0.3)      | 9.4 (0.4)      | 8.2 (0.7)      | 10.2 (0.8)     |
| At 30 months                                            | 9.9 (0.4)      | 10.0 (0.5)     | 8.8 (0.8)      | 11.0 (1.0)     |
| At 36 months                                            | 10.4 (0.4)     | 10.5 (0.5)     | 9.2 (0.9)      | 11.5 (1.1)     |
| <b>Estimates for on treatment rates, % (SE)</b>         |                |                |                |                |
| 12 months                                               | 31.9 (1.9)     | 33.1 (2.5)     | 26.3 (3.7)     | 34.7 (4.4)     |
| 24 months                                               | 13.6 (1.4)     | 12.1 (1.8)     | 12.9 (2.9)     | 18.7 (3.6)     |
| 30 months                                               | 9.2 (1.2)      | 8.8 (1.6)      | 7.8 (2.4)      | 12.5 (3.1)     |
| 36 months                                               | 5.7 (1.1)      | 6.8 (1.5)      | 5.2 (2.0)      | 5.3 (2.1)      |

Note. CI: confidence interval; rwToT: real-world time on treatment; SE: standard error.

**Table S5.** Real-world Tumor Response Rate (rwTRR) and real-world Tumor Control Rate (rwTCR), overall and by line of therapy.

| Estimate                 | Overall           | 1st line          | 2nd line          | 3+ line           |
|--------------------------|-------------------|-------------------|-------------------|-------------------|
| <b>rwTRR, % (95% CI)</b> |                   |                   |                   |                   |
| Missing                  | 7.2 (5.3, 9.2)    | 8.7 (6.0, 11.5)   | 4.9 (1.4, 8.4)    | 5.0 (1.1, 8.9)    |
| Response                 | 24.4 (21.1, 27.7) | 24.9 (20.7, 29.2) | 21.0 (14.3, 27.7) | 26.7 (18.8, 34.6) |
| Non-response             | 68.4 (64.8, 71.9) | 66.3 (61.7, 71.0) | 74.1 (66.9, 81.3) | 68.3 (60.0, 76.7) |
| <b>rwTCR, % (95% CI)</b> |                   |                   |                   |                   |
| Missing                  | 7.2 (5.3, 9.2)    | 8.7 (6.0, 11.5)   | 4.9 (1.4, 8.4)    | 5.0 (1.1, 8.9)    |
| Control                  | 40.2 (36.5, 43.9) | 43.4 (38.5, 48.2) | 35.0 (27.1, 42.8) | 35.8 (27.3, 44.4) |
| Non-control              | 52.6 (48.8, 56.4) | 47.9 (43.0, 52.8) | 60.1 (52.1, 68.2) | 59.2 (50.4, 68.0) |

Note. CI: confidence interval; rwTCR: real-world tumor control rate; rwTRR: real-world tumor response rate.
